# Supplementary material
Source: PubMed Central journal article supplement (PMC6287526)
Supplement: jc-16-2660.pdf [file jc-16-2660.pdf]

**Supplemental Table 1: Characteristics of adult NHANES participants with normal TSH levels, by levothyroxine use.**

|                                               | LT <sub>4</sub> -treated<br>(n=469) | Healthy Controls<br>(n=9512) | p-value* |
|-----------------------------------------------|-------------------------------------|------------------------------|----------|
| Age (years)                                   | 64.3 ± 14.1                         | 46.8 ± 18.6                  | <0.0001  |
| Female (%)                                    | 360 (77%)                           | 4648 (49%)                   | <0.0001  |
| Race (%)                                      |                                     |                              |          |
| Non-Hispanic White                            | 336 (71%)                           | 4194 (44%)                   | <0.0001  |
| Non-Hispanic Black                            | 36 (8%)                             | 1954 (21%)                   |          |
| Hispanic                                      | 76 (16%)                            | 2703 (28%)                   |          |
| Other                                         | 21 (4%)                             | 6661 (7%)                    |          |
| Serum TSH (mIU/L)                             | 2.13 ± 1.32                         | 1.73 ± 0.96                  | <0.0001  |
| Serum Free T <sub>3</sub> (pg/mL)             | 2.85 ± 0.33                         | 3.19 ± 0.46                  | <0.0001  |
| Serum Total T <sub>3</sub> (ng/mL)            | 97.56 ± 20.64                       | 114.81 ± 23.21               | <0.0001  |
| Serum Free T <sub>4</sub> (ng/mL)             | 0.94 ± 0.21                         | 0.79 ± 0.13                  | <0.0001  |
| Serum Total T <sub>4</sub> (ug/dL)            | 9.14 ± 1.76                         | 7.97 ± 1.57                  | <0.0001  |
| Free T <sub>3</sub> :Free T <sub>4</sub> §    | 3.18 ± 0.80                         | 4.14 ± 0.85                  | <0.0001  |
| Total T <sub>3</sub> : Free T <sub>4</sub> §  | 109.59 ± 36.30                      | 149.55 ± 40.73               | <0.0001  |
| Total T <sub>3</sub> : Total T <sub>4</sub> § | 11.01 ± 2.85                        | 14.73 ± 3.23                 | <0.0001  |

Data are mean ± SD, n (%). P-value by chi-square (categorical data) or student's t test (continuous data).

LT<sub>4</sub>: levothyroxine; TSH: thyroid stimulating hormone; T<sub>4</sub>: thyroxine; T<sub>3</sub> tri-iodothyronine. \*For the comparison of LT<sub>4</sub>-treated and healthy controls. †For the comparison of LT<sub>4</sub>-treated and matched controls. §Multiplied x 1000.

**Supplemental Table 2: Clinical parameters of adult NHANES participants with normal TSH levels**

|                                                                            | LT <sub>4</sub> -treated<br>(n=469) | Healthy Controls<br>(n=9512) | p-value* |
|----------------------------------------------------------------------------|-------------------------------------|------------------------------|----------|
| <b>Objective measures</b>                                                  |                                     |                              |          |
| BMI (kg/m <sup>2</sup> )                                                   | 29.8 ± 6.7                          | 28.5 ± 6.6                   | <0.0001  |
| Systolic blood pressure (mm Hg)                                            | 131 ± 22                            | 124 ± 19                     | <0.0001  |
| Diastolic blood pressure (mm Hg)                                           | 68 ± 14                             | 70 ± 13                      | <0.0001  |
| Heart rate (beats per minute)                                              | 72 ± 12                             | 73 ± 12                      | 0.18     |
| HbA <sub>1c</sub> (%)                                                      | 5.9 ± 0.9                           | 5.7 ± 1.0                    | <0.0001  |
| Fasting glucose (mg/dL)                                                    | 106 ± 37                            | 100 ± 38                     | <0.0001  |
| Total cholesterol (mg/dL)                                                  | 197 ± 41                            | 195 ± 42                     | 0.49     |
| HDL (mg/dL)                                                                | 54 ± 16                             | 52 ± 16                      | <0.01    |
| LDL (mg/dL)                                                                | 115 ± 35<br>(n=175)                 | 115 ± 36<br>(n=3618)         | 0.77     |
| Triglyceride (mg/dL)                                                       | 144 ± 86<br>(n=180)                 | 135 ± 109<br>(n=3715)        | 0.30     |
| C-reactive protein (mg/dL)                                                 | 0.50 ± 0.64<br>(n=400)              | 0.41 ± 0.81<br>(n=8128)      | 0.03     |
| Ferritin (ng/mL)                                                           | 102 ± 106<br>(n=103)                | 81 ± 100<br>(n=3198)         | 0.03     |
| Creatinine (mg/dL)                                                         | 0.93 ± 0.53                         | 0.89 ± 0.37                  | 0.01     |
| Creatine phosphokinase (IU/L)                                              | 118 ± 91<br>(n=69)                  | 168 ± 196<br>(n=1561)        | 0.04     |
| <b>Medication use</b>                                                      |                                     |                              |          |
| Beta-blocker (%)                                                           | 175 (37%)                           | 1161 (12%)                   | <0.0001  |
| Statin (%)                                                                 | 111 (24%)                           | 838 (9%)                     | <0.0001  |
| Insulin (%)                                                                | 20 (4%)                             | 203 (2%)                     | <0.01    |
| Oral hypoglycemic (%)                                                      | 59 (45%)                            | 668 (46%)                    | 0.89     |
| Anti-depressant (%)                                                        | 101 (22%)                           | 716 (8%)                     | <0.0001  |
| Anti-anxiety (%)                                                           | 30 (6%)                             | 249 (3%)                     | <0.0001  |
| Anti-psychotic (%)                                                         | 5 (1%)                              | 73 (1%)                      | 0.47     |
| <b>Metabolic equivalents (METs)/Physical parameters</b>                    |                                     |                              |          |
| Total MET (work and recreational activity)                                 | 2255 ± 3464                         | 4887 ± 6829                  | <0.0001  |
| Work/job requires vigorous activity (%)                                    | 42 (10%)                            | 1629 (20%)                   | <0.0001  |
| Vigorous work MET                                                          | 3765 ± 4215                         | 7168 ± 7205                  | <0.01    |
| Work/job requires moderate activity (%)                                    | 115 (27%)                           | 3063 (38%)                   | <0.0001  |
| Moderate work MET                                                          | 2000 ± 2429                         | 3248 ± 3336                  | <0.0001  |
| Walks/bikes for transportation (%)                                         | 75 (18%)                            | 2311 (28%)                   | <0.0001  |
| Transportation MET                                                         | 826 ± 952                           | 1484 ± 2146                  | <0.01    |
| Participates in vigorous recreational activity (%)                         | 43 (10%)                            | 1822 (22%)                   | <0.0001  |
| Vigorous recreational MET                                                  | 658 ± 573                           | 935 ± 833                    | 0.03     |
| Participates in moderate recreational activity (%)                         | 173 (41%)                           | 3129 (38%)                   | 0.27     |
| Moderate recreational MET                                                  | 746 ± 595                           | 905 ± 1084                   | 0.05     |
| <b>Cognitive/Well-being parameters</b>                                     |                                     |                              |          |
| Stated health condition (%)                                                |                                     |                              |          |
| Excellent                                                                  | 26 (6%)                             | 948 (11%)                    | <0.0001  |
| Very good                                                                  | 115 (26%)                           | 2418 (28%)                   |          |
| Good                                                                       | 185 (42%)                           | 3520 (40%)                   |          |
| Fair                                                                       | 81 (19%)                            | 1601 (18%)                   |          |
| Poor                                                                       | 31 (7%)                             | 272 (3%)                     |          |
| Number of days in the past month physical health was not good              | 5.6 ± 11.5                          | 3.8 ± 8.6                    | <0.0001  |
| Number of days in the past month mental health was not good                | 5.1 ± 11.6                          | 4.1 ± 8.6                    | 0.03     |
| Number of days in the past month inactive due to physical or mental health | 2.5 ± 7.7                           | 1.9 ± 6.6                    | 0.08     |
| Physical, mental or emotional limitation kept from working (%)             | 82 (18%)                            | 1062 (12%)                   | <0.0001  |
| Experience confusion/memory problem (%)                                    | 62 (13%)                            | 634 (7%)                     | <0.0001  |

|                                                                      |            |             |         |
|----------------------------------------------------------------------|------------|-------------|---------|
| Limited in activity due to physical, mental or emotional problem (%) | 16 (6%)    | 214 (3%)    | 0.02    |
| <b>Social factors</b>                                                |            |             |         |
| Smoked at least 100 cigarettes in lifetime (%)                       | 219 (47%)  | 4158 (47%)  | 0.81    |
| Currently smoking daily (%)                                          | 47 (21%)   | 1641 (40%)  | <0.0001 |
| Consumed at least 12 alcoholic drinks per year (%)                   | 181 (64%)  | 3835 (71%)  | 0.02    |
| <b>Nutrient intake</b>                                               |            |             |         |
| Calories consumed in 24 hour recall (kcal/day)                       | 1761 ± 715 | 2145 ± 1040 | <0.0001 |
| Calories consumed, adjusted by body weight (kcal/day/kg)             | 23 ± 9     | 28 ± 15     | <0.0001 |
| % calorie intake compared to DRI for energy                          | 90 ± 38    | 111 ± 59    | <0.0001 |
| Carbohydrate consumed (g)                                            | 217 ± 94   | 264 ± 134   | <0.0001 |
| Carbohydrate consumed (%)                                            | 50 ± 11    | 50 ± 11     | 0.88    |
| Protein consumed (g)                                                 | 67 ± 31    | 82 ± 43     | <0.0001 |
| Protein consumed (%)                                                 | 16 ± 4     | 16 ± 5      | 0.84    |
| Fat consumed (g)                                                     | 68 ± 36    | 80 ± 47     | <0.0001 |
| Fat consumed (%)                                                     | 34 ± 9     | 33 ± 9      | 0.05    |
| Selenium intake (mcg)                                                | 52 ± 44    | 52 ± 81     | 0.99    |

**Supplemental Table 3: Thyroid hormone levels of healthy controls, by serum TSH.**

|                                               | Healthy Controls<br>(n=9512) |                           |
|-----------------------------------------------|------------------------------|---------------------------|
|                                               | TSH 0.24-1.74<br>(n=5733)    | TSH 1.75-5.40<br>(n=3779) |
| Age (years)                                   | 44.5 ± 18.0                  | 50.1 ± 18.9 *             |
| Female (%)                                    | 2815 (49%)                   | 1833 (49%)                |
| Race/Ethnicity (%)                            |                              | *                         |
| Non-Hispanic white                            | 2244 (39%)                   | 1950 (52%)                |
| Non-Hispanic black                            | 1410 (25%)                   | 544 (14%)                 |
| Hispanic                                      | 1646 (28%)                   | 1057 (28%)                |
| Other                                         | 433 (8%)                     | 228 (6%)                  |
| Serum TSH (mIU/L)                             | 1.12 ± 0.37                  | 2.67 ± 0.80 *             |
| Serum Free T <sub>3</sub> (pg/mL)             | 3.21 ± 0.51                  | 3.16 ± 0.38 *             |
| Serum Total T <sub>3</sub> (ng/mL)            | 115.05 ± 23.15               | 114.43 ± 23.30            |
| Serum Free T <sub>4</sub> (ng/mL)             | 0.80 ± 0.14                  | 0.78 ± 0.13 *             |
| Serum Total T <sub>4</sub> (ug/dL)            | 8.03 ± 1.58                  | 7.88 ± 1.54 *             |
| Free T <sub>3</sub> :Free T <sub>4</sub> §    | 4.13 ± 0.91                  | 4.15 ± 0.76               |
| Total T <sub>3</sub> : free T <sub>4</sub> §  | 148.55 ± 40.97               | 151.07 ± 40.34 *          |
| Total T <sub>3</sub> : total T <sub>4</sub> § | 14.65 ± 3.21                 | 14.85 ± 3.26 *            |

The mean serum TSH level from the entire population was 1.75 mIU/L. Participants within each group were then classified as having serum TSH levels above or below this mean, and then thyroid function tests reassessed for each subgroup. Data are mean ± SD, n (%). P-value by chi-square (categorical data) or student's t test (continuous data). LT<sub>4</sub>: levothyroxine; TSH: thyroid stimulating hormone; T<sub>4</sub>: thyroxine; T<sub>3</sub> tri-iodothyronine. \*For the comparison of LT<sub>4</sub>-treated and healthy controls. †For the comparison of LT<sub>4</sub>-treated and matched controls. §Multiplied x 1000.

**Supplemental Table 4: Clinical parameters of participant groups, by serum TSH.**

|                                                      | LT <sub>4</sub> -treated<br>(n=469) |                          | Healthy Controls<br>(n=9512) |                           | Matched Controls<br>(n=469) |                          |
|------------------------------------------------------|-------------------------------------|--------------------------|------------------------------|---------------------------|-----------------------------|--------------------------|
|                                                      | TSH 0.24-1.74<br>(n=208)            | TSH 1.75-5.40<br>(n=247) | TSH 0.24-1.74<br>(n=5733)    | TSH 1.75-5.40<br>(n=3779) | TSH 0.24-1.74<br>(n=210)    | TSH 1.75-5.40<br>(n=259) |
| <b>Objective measures</b>                            |                                     |                          |                              |                           |                             |                          |
| BMI (kg/m <sup>2</sup> )                             | 29.6 ± 6.2                          | 29.9 ± 7.1               | 28.0 ± 6.3                   | 29.2 ± 7.0 *              | 27.6 ± 5.7                  | 28.7 ± 6.6               |
| Systolic blood pressure (mm Hg)                      | 129 ± 21                            | 132 ± 22                 | 122 ± 19                     | 126 ± 20 *                | 129 ± 21                    | 133 ± 23                 |
| Diastolic blood pressure (mm Hg)                     | 68 ± 13                             | 67 ± 15                  | 70 ± 13                      | 71 ± 14 *                 | 69 ± 13                     | 68 ± 15                  |
| Heart rate (beats per minute)                        | 73 ± 13                             | 72 ± 12                  | 73 ± 13                      | 73 ± 13                   | 73 ± 13                     | 71 ± 12                  |
| HbA <sub>1c</sub> (%)                                | 5.9 ± 0.8                           | 5.9 ± 1.0                | 5.7 ± 1.0                    | 5.7 ± 1.0 *               | 5.8 ± 0.9                   | 5.9 ± 0.9                |
| Fasting glucose (mg/dL)                              | 105 ± 34                            | 108 ± 38                 | 99 ± 39                      | 102 ± 37 *                | 105 ± 38                    | 102 ± 28                 |
| Total cholesterol (mg/dL)                            | 195 ± 42                            | 198 ± 41                 | 194 ± 42                     | 197 ± 42 *                | 206 ± 42                    | 204 ± 43§                |
| HDL (mg/dL)                                          | 56 ± 17                             | 53 ± 15†                 | 52 ± 16                      | 51 ± 16 *                 | 58 ± 17                     | 56 ± 16                  |
| LDL (mg/dL)                                          | 108 ± 36<br>(n=75)                  | 120 ± 33†<br>(n=100)     | 116 ± 36<br>(n=2080)         | 115 ± 37<br>(n=1538)      | 121 ± 36<br>(n=72)          | 124 ± 38<br>(n=108)      |
| Triglyceride (mg/dL)                                 | 126 ± 75<br>(n=76)                  | 157 ± 91 †<br>(n=104)    | 127 ± 102<br>(n=2142)        | 146 ± 118 *<br>(n=1609)   | 127 ± 64<br>(n=72)          | 138 ± 70<br>(n=109)      |
| CRP (mg/dL)                                          | 0.42 ± 0.52<br>(n=180)              | 0.57 ± 0.72†<br>(n=220)  | 0.40 ± 0.83<br>(n=4737)      | 0.43 ± 0.78<br>(n=3205)   | 0.44 ± 0.82<br>(n=180)      | 0.54 ± 1.12<br>(n=222)   |
| Ferritin (ng/mL)                                     | 99 ± 103<br>(n=41)                  | 104 ± 109<br>(n=62)      | 78 ± 99<br>(n=2049)          | 87 ± 102 *<br>(n=1104)    | 88 ± 91<br>(n=42)           | 90 ± 86<br>(n=59)        |
| Creatinine (mg/dL)                                   | 0.93 ± 0.71                         | 0.93 ± 0.31              | 0.87 ± 0.36                  | 0.91 ± 0.38*              | 0.88 ± 0.38                 | 0.92 ± 0.33              |
| Creatinine phosphokinase (IU/L)                      | 106 ± 64<br>(n=33)                  | 129 ± 110<br>(n=36)      | 173 ± 206<br>(n=993)         | 160 ± 178<br>(n=568)      | 103 ± 72<br>(n=30)          | 115 ± 68<br>(n=37)       |
| <b>Medication use</b>                                |                                     |                          |                              |                           |                             |                          |
| Beta-blocker (%)                                     | 68 (31%)                            | 107 (42%) †              | 603 (11%)                    | 558 (15%) *               | 49(23%)                     | 61 (24%)                 |
| Statin (%)                                           | 64 (30%)                            | 47 (18%) †               | 461 (8%)                     | 377 (10%) *               | 35 (17%)                    | 37 (14%)                 |
| Taking insulin (%)                                   | 7 (4%)                              | 13 (6%)                  | 111 (2%)                     | 92 (2%)                   | 5 (2%)                      | 9 (3%)                   |
| Oral hypoglycemic (%)                                | 38 (18%)                            | 33 (14%)                 | 429 (7%)                     | 354 (9%)                  | 24 (11%)                    | 40 (15%)                 |
| Anti-depressant (%)                                  | 47 (22%)                            | 54 (21%) †               | 372 (7%)                     | 344 (9%) *                | 23 (11%)                    | 46 (18%)                 |
| Anti-anxiety (%)                                     | 16 (8%)                             | 14 (6%)                  | 143 (3%)                     | 106 (3%)                  | 15 (7%)                     | 14 (5%)                  |
| Anti-psychotic (%)                                   | 45 (1%)                             | 1 (1%)                   | 45 (1%)                      | 28 (1%)                   | 2(1%)                       | 47 (1%)                  |
| <b>Metabolic equivalent (METs)/Physical activity</b> |                                     |                          |                              |                           |                             |                          |
| Total MET (work and recreational activity)           | 2407 ± 4048                         | 2124 ± 2872              | 5139 ± 7107                  | 4497 ± 6356 *             | 3084 ± 3942                 | 3185 ± 5340              |
| Work/job requires vigorous activity (%)              | 18 (10%)                            | 24 (10%) †               | 1026 (21%)                   | 603 (18%) *               | 31 (8%)                     | 40 (9%)                  |
| Vigorous work MET                                    | 3840 ± 4677                         | 3708 ± 3938              | 7489 ± 7337                  | 6622 ± 6948 *             | 5280 ± 5606                 | 6760 ± 8218              |
| Work/job requires moderate activity (%)              | 57 (29%)                            | 58 (25%)                 | 1821 (38%)                   | 1242 (38%)                | 125 (31%)                   | 126 (27%)                |
| Moderate work MET                                    | 2253 ± 2757                         | 1750 ± 2051              | 3363 ± 3390                  | 3081 ± 3249 *             | 2901 ± 2950                 | 3071 ± 3734              |
| Walks/bikes for transportation (%)                   | 32 (16%)                            | 43 (19%)                 | 1455 (30%)                   | 856(26%) *                | 79 (20%)                    | 86 (18%)                 |
| Transportation MET                                   | 939 ± 1004                          | 743 ± 914                | 1559 ± 2323                  | 1355 ± 1799 *             | 1599 ± 2280                 | 1192 ± 1629              |
| Participates in vigorous recreational activity (%)   | 21 (10%)                            | 22 (9%)                  | 1169 (24%)                   | 653 (20%) *               | 34 (9%)                     | 49 (10%)                 |

|                                                                            |            |            |             |               |            |            |
|----------------------------------------------------------------------------|------------|------------|-------------|---------------|------------|------------|
| Vigorous recreational MET                                                  | 805 ± 759  | 518 ± 257  | 936 ± 786   | 931 ± 911     | 655 ± 680  | 716 ± 829  |
| Participates in moderate recreational activity (%)                         | 76 (39%)   | 97 (43%)   | 1895 (39%)  | 1234 (37%)    | 133 (33%)  | 184 (39%)  |
| Moderate recreational MET                                                  | 741 ± 603  | 750 ± 591  | 909 ± 1110  | 898 ± 1042    | 755 ± 719  | 891 ± 918  |
| <b>Cognitive/well-being parameters</b>                                     |            |            |             |               |            |            |
| Stated health condition (%)                                                |            |            |             |               |            |            |
| Excellent                                                                  | 11 (6%)    | 15 (6%)    | 578 (11%)   | 370 (10%)     | 20 (10%)   | 19 (7%)    |
| Very good                                                                  | 52 (26%)   | 63 (26%)   | 1463 (28%)  | 955 (27%)     | 52 (27%)   | 59 (25%)   |
| Good                                                                       | 90 (45%)   | 95 (40%)   | 2140 (40%)  | 1380 (39%)    | 75 (39%)   | 106 (44%)  |
| Fair                                                                       | 37 (18%)   | 44 (19%)   | 930 (18%)   | 671 (19%)     | 33 (17%)   | 47(20%)    |
| Poor                                                                       | 11(6%)     | 20(8%)     | 152 (3%)    | 120 (4%)      | 12 (6%)    | 10 (4%)    |
| Number of days in the past month physical health was not good              | 5.9 ± 13.2 | 5.3 ± 9.7  | 3.8 ± 8.5   | 3.9 ± 8.9     | 5.6 ± 11.6 | 4.8 ± 8.9  |
| Number of days in the past month mental health was not good                | 4.9 ± 12.5 | 5.1 ± 10.8 | 4.1 ± 8.4   | 4.0 ± 9.0     | 5.0 ± 11.7 | 5.0 ± 10.8 |
| Number of days in the past month inactive due to physical or mental health | 2.3 ± 8.6  | 2.6 ± 6.8  | 1.8 ± 6.5   | 1.9 ± 6.8     | 2.1 ± 7.5  | 2.3 ± 6.6  |
| Physical, mental, or emotional limitation kept from working (%)            | 40 (19%)   | 42 (17%)   | 587 (11%)   | 475 (13%) *   | 38 (18%)   | 34 (13%)   |
| Experience confusion/memory problem (%)                                    | 34 (16%)   | 28 (11%)   | 354 (7%)    | 280 (8%) *    | 21(10%)    | 24 (9%)    |
| Limited in activity due to physical, mental or emotional problem (%)       | 7 (5%)     | 9 (6%)     | 128 (3%)    | 86 (3%)       | 11 (8%)    | 6 (3%)     |
| <b>Social factors</b>                                                      |            |            |             |               |            |            |
| Smoked at least 100 cigarettes in lifetime (%)                             | 100 (47%)  | 119 (47%)  | 2567 (48%)  | 1591 (44%) *  | 99 (47%)   | 114 (45%)  |
| Currently smoking daily (%)                                                | 21 (21%)   | 26 (22%)   | 1108 (43%)  | 533 (34%) *   | 28 (13%)   | 23 (9%)    |
| Consumed at least 12 alcoholic drinks per year (%)                         | 77 (65%)   | 104 (63%)  | 2251 (71%)  | 1584 (71%)    | 68 (56%)   | 110 (65%)  |
| Number of alcoholic drinks consumed per day                                | 1.9 ± 1.7  | 1.7 ± 1.3  | 3.1 ± 3.2   | 2.9 ± 3.4     | 2.0 ± 1.5  | 1.9 ± 1.2  |
| <b>Nutrient intake</b>                                                     |            |            |             |               |            |            |
| Calories consumed (kcal/day)                                               | 1701 ± 634 | 1811 ± 775 | 2180 ± 1063 | 2092 ± 1001 * | 1677 ± 708 | 1831 ± 911 |
| Calories adjusted by body weight (kcal/day/kg)                             | 22 ± 8     | 23 ± 10    | 29 ± 15     | 27 ± 14 *     | 23 ± 10    | 24 ± 13    |
| % calorie intake                                                           | 89 ± 34    | 93 ± 41    | 115 ± 60    | 107 ± 57*     | 91 ± 39    | 96 ± 52    |
| Carbohydrate consumed (g)                                                  | 208 ± 85   | 225 ± 100  | 268 ± 135   | 258 ± 132 *   | 206 ± 91   | 228 ± 115  |
| Carbohydrate consumed (%)                                                  | 50 ± 11    | 50 ± 10    | 50 ± 11     | 50 ± 12       | 50 ± 11    | 51 ± 11    |
| Protein consumed (g)                                                       | 64 ± 26    | 70 ± 34 †  | 83 ± 44     | 80 ± 42 *     | 64 ± 30    | 69 ± 35    |
| Protein consumed (%)                                                       | 15 ± 4     | 16 ± 4     | 16 ± 5      | 16 ± 5        | 16 ± 5     | 15 ± 4     |
| Fat consumed (g)                                                           | 66 ± 34    | 69 ± 39    | 81 ± 48     | 78 ± 46 *     | 64 ± 34    | 69 ± 42    |
| Fat consumed (%)                                                           | 34 ± 9     | 33 ± 8     | 33 ± 9      | 33 ± 9        | 33 ± 9     | 34 ± 9     |
| Selenium intake (mcg)                                                      | 53 ± 43    | 52 ± 43    | 53 ± 95     | 52 ± 58       | 55 ± 49    | 51 ± 41    |

The mean serum TSH level from the entire population was 1.75 mIU/L. Participants within each group were then classified as having serum TSH levels above or below this mean, and then thyroid function tests reassessed for each subgroup. Data are mean  $\pm$  SD, n (%). P-value by chi-square (categorical data) or student's t test (continuous data). LT4: levothyroxine, TSH: thyroid stimulating hormone, T4: thyroxine, T3: tri-iodothyronine, BMI: body mass index, HbA<sub>1C</sub>: hemoglobin A<sub>1C</sub>, LDL: low-density lipoprotein cholesterol, HDL: high-density lipoprotein cholesterol, DRI: dietary reference intake. † For the comparison of LT4-treated. \* For the comparison of healthy controls. §For the comparison of matched controls.

**Supplemental Table 5: Correlations of clinical parameters with free T<sub>3</sub>:free T<sub>4</sub>.**

|                                                                            | LT <sub>4</sub> -treated<br>(n=469) |         | Healthy Controls<br>(n=9512) |         | Matched controls<br>(n=469) |           |
|----------------------------------------------------------------------------|-------------------------------------|---------|------------------------------|---------|-----------------------------|-----------|
|                                                                            | Correlation coefficient             | p-value | Correlation coefficient      | p-value | Correlation coefficient     | p-value   |
| <b>Demographics</b>                                                        |                                     |         |                              |         |                             |           |
| Age (years)                                                                | -0.41                               | <0.0001 | -0.25                        | <0.0001 | -0.277                      | <0.0001   |
| Female (%)                                                                 | -0.15                               | <0.01   | -0.08                        | <0.0001 | -0.043                      | 0.35      |
| Race/Ethnicity (%)                                                         |                                     |         |                              |         |                             |           |
| Non-Hispanic White                                                         | -0.09                               | 0.05    | -0.03                        | <0.0001 | -0.073                      | 0.12      |
| Non-Hispanic Black                                                         | 0.05                                | 0.25    | 0.00                         | 0.850   | -0.025                      | 0.59      |
| Hispanic                                                                   | 0.08                                | 0.08    | 0.09                         | <0.0001 | 0.131                       | <0.010.35 |
| Other                                                                      | -0.01                               | 0.80    | -0.09                        | <0.0001 | -0.043                      |           |
| <b>Objective measures</b>                                                  |                                     |         |                              |         |                             |           |
| BMI (kg/m <sup>2</sup> )                                                   | 0.14                                | <0.01   | 0.05                         | <0.0001 | 0.14                        | <0.01     |
| Systolic blood pressure (mm Hg)                                            | -0.12                               | 0.01    | -0.07                        | <0.0001 | -0.04                       | 0.41      |
| Diastolic blood pressure (mm Hg)                                           | 0.22                                | <0.0001 | 0.08                         | <0.0001 | 0.18                        | <0.0001   |
| Heart rate (beats per minute)                                              | 0.10                                | 0.03    | 0.06                         | <0.0001 | 0.02                        | 0.64      |
| HbA <sub>1c</sub> (%)                                                      | 0.01                                | 0.92    | -0.11                        | <0.0001 | 0.01                        | 0.88      |
| Fasting glucose (mg/dL)                                                    | -0.03                               | 0.55    | -0.10                        | <0.0001 | 0.02                        | 0.74      |
| Total cholesterol (mg/dL)                                                  | 0.07                                | 0.12    | 0.07                         | <0.0001 | 0.05                        | 0.28      |
| LDL (mg/dL)                                                                | 0.04                                | 0.64    | 0.05                         | <0.01   | 0.05                        | 0.52      |
| HDL (mg/dL)                                                                | -0.09                               | 0.04    | -0.09                        | <0.0001 | -0.13                       | <0.01     |
| Triglyceride (mg/dL)                                                       | 0.30                                | <0.0001 | 0.14                         | <0.0001 | 0.29                        | <0.0001   |
| C-reactive protein (mg/dL)                                                 | -0.03                               | 0.61    | -0.08                        | <0.0001 | -0.08                       | 0.10      |
| Ferritin (ng/mL)                                                           | 0.02                                | 0.85    | -0.03                        | 0.09    | 0.16                        | 0.12      |
| Creatinine (mg/dL)                                                         | -0.14                               | <0.01   | -0.12                        | <0.0001 | -0.23                       | <0.0001   |
| Creatinine phosphokinase (IU/L)                                            | 0.16                                | 0.18    | 0.12                         | <0.0001 | 0.16                        | 0.20      |
| <b>Medication use</b>                                                      |                                     |         |                              |         |                             |           |
| Beta-blocker (%)                                                           | -0.06                               | 0.21    | -0.11                        | <0.0001 | -0.12                       | 0.01      |
| Statin (%)                                                                 | 0.01                                | 0.76    | -0.06                        | <0.0001 | 0.07                        | 0.11      |
| Insulin (%)                                                                | 0.04                                | 0.35    | -0.06                        | <0.0001 | -0.01                       | 0.78      |
| Oral hypoglycemic (%)                                                      | 0.17                                | 0.06    | 0.13                         | <0.0001 | 0.11                        | 0.25      |
| Anti-depressant (%)                                                        | 0.12                                | <0.01   | -0.01                        | 0.93    | 0.02                        | 0.71      |
| Anti-anxiety (%)                                                           | -0.04                               | 0.41    | -0.01                        | 0.20    | -0.05                       | 0.25      |
| Anti-psychotic (%)                                                         | -0.03                               | 0.52    | -0.01                        | 0.87    | -0.04                       | 0.45      |
| <b>Metabolic equivalents (METs)/Physical parameters</b>                    |                                     |         |                              |         |                             |           |
| Total MET (work and rec activity)                                          | 0.04                                | 0.48    | 0.12                         | <0.0001 | 0.06                        | 0.31      |
| Work/job requires vigorous activity (%)                                    | -0.01                               | 0.956   | -0.10                        | <0.0001 | 0.02                        | 0.71      |
| Vigorous work MET                                                          | -0.14                               | 0.39    | 0.08                         | <0.01   | 0.25                        | 0.21      |
| Work/job requires moderate activity (%)                                    | 0.02                                | 0.66    | -0.07                        | <0.0001 | -0.04                       | 0.43      |
| Moderate work MET                                                          | 0.21                                | 0.03    | 0.10                         | <0.0001 | 0.13                        | 0.15      |
| Walks/bikes for transportation (%)                                         | -0.05                               | 0.34    | -0.04                        | <0.01   | -0.02                       | 0.67      |
| Transportation MET                                                         | 0.07                                | 0.57    | 0.03                         | 0.15    | 0.03                        | 0.80      |
| Participates in vigorous recreational activity (%)                         | -0.11                               | 0.03    | -0.04                        | <0.0001 | -0.03                       | 0.58      |
| Vigorous recreational MET                                                  | -0.14                               | 0.38    | 0.09                         | <0.0001 | 0.24                        | 0.15      |
| Participates in moderate recreational activity (%)                         | -0.03                               | 0.54    | -0.01                        | 0.68    | -0.05                       | 0.29      |
| Moderate recreational MET                                                  | -0.08                               | 0.33    | 0.05                         | 0.01    | 0.07                        | 0.40      |
| <b>Cognitive/well-being parameters</b>                                     |                                     |         |                              |         |                             |           |
| Number of days in the past month physical health was not good              | 0.10                                | 0.04    | -0.04                        | <0.01   | -0.02                       | 0.76      |
| Number of days in the past month mental health was not good                | 0.07                                | 0.16    | 0.02                         | 0.04    | 0.01                        | 0.85      |
| Number of days in the past month inactive due to physical or mental health | 0.08                                | 0.08    | -0.03                        | <0.01   | 0.02                        | 0.67      |
| Physical, mental or emotional limitation kept from working (%)             | -0.03                               | 0.55    | 0.06                         | <0.0001 | -0.01                       | 0.88      |
| Experience confusion/memory problem (%)                                    | -0.01                               | 0.98    | 0.04                         | <0.0001 | 0.10                        | 0.03      |
| Limited in activity due to physical, mental or emotional problem (%)       | 0.11                                | 0.08    | 0.02                         | 0.05    | -0.01                       | 0.85      |
| <b>Social factors</b>                                                      |                                     |         |                              |         |                             |           |
| Smoked at least 100 cigarettes                                             | -0.01                               | 0.82    | -0.02                        | 0.12    | 0.01                        | 0.79      |
| Currently smoking daily                                                    | 0.14                                | 0.04    | -0.10                        | <0.0001 | 0.05                        | 0.50      |
| Consumed at least 12 drinks per year                                       | -0.12                               | 0.04    | -0.10                        | <0.0001 | 0.04                        | 0.51      |



| <b>Nutrient Intake</b>                                   |       |         |       |         |       |      |
|----------------------------------------------------------|-------|---------|-------|---------|-------|------|
| Calories consumed in 24 hour recall (kcal/day)           | 0.19  | <0.0001 | 0.16  | <0.0001 | 0.11  | 0.02 |
| Calories consumed, adjusted by body weight (kcal/day/kg) | 0.06  | 0.24    | 0.10  | <0.0001 | 0.02  | 0.68 |
| % calorie intake compared to DRI for energy              | 0.06  | 0.24    | 0.10  | <0.0001 | 0.02  | 0.68 |
| Carbohydrate consumed (g)                                | 0.13  | <0.01   | 0.14  | <0.0001 | 0.08  | 0.09 |
| Carbohydrate consumed (%)                                | -0.06 | 0.21    | -0.02 | 0.05    | 0.04  | 0.35 |
| Protein consumed (g)                                     | 0.20  | <0.0001 | 0.11  | <0.0001 | 0.07  | 0.15 |
| Protein consumed (%)                                     | 0.01  | 0.87    | -0.05 | <0.0001 | -0.11 | 0.02 |
| Fat consumed (g)                                         | 0.15  | <0.01   | 0.12  | <0.0001 | 0.09  | 0.06 |
| Fat consumed (%)                                         | 0.02  | 0.93    | -0.01 | 0.74    | -0.04 | 0.38 |
| Selenium intake (mcg)                                    | 0.01  | 0.98    | 0.02  | 0.47    | -0.09 | 0.35 |

Data are Pearson's correlation coefficient (r) and corresponding p-value. T<sub>4</sub>: thyroxine; T<sub>3</sub>: tri-iodothyronine, BMI: body mass index, HbA<sub>1C</sub>: hemoglobin A<sub>1C</sub>, LDL: low-density lipoprotein cholesterol, HDL: high-density lipoprotein cholesterol, DRI: dietary reference intake.

**Supplemental Table 6: Correlations of clinical parameters with free T<sub>3</sub>.**

|                                                                            | LT <sub>4</sub> -treated<br>(n=469) |           | Healthy Controls<br>(n=9512) |         | Matched controls<br>(n=469) |         |
|----------------------------------------------------------------------------|-------------------------------------|-----------|------------------------------|---------|-----------------------------|---------|
|                                                                            | Correlation coefficient             | p-value   | Correlation coefficient      | p-value | Correlation coefficient     | p-value |
| <b>Demographics</b>                                                        |                                     |           |                              |         |                             |         |
| Age (years)                                                                | -0.33                               | <0.0001   | -0.34                        | <0.0001 | -0.29                       | <0.0001 |
| Female (%)                                                                 | -0.09                               | 0.06      | -0.18                        | <0.0001 | -0.02                       | 0.609   |
| Race/Ethnicity (%)                                                         |                                     |           |                              |         |                             |         |
| Non-Hispanic White                                                         | -0.13                               | <0.010.90 | -0.08                        | <0.0001 | -0.12                       | 0.008   |
| Non-Hispanic Black                                                         | 0.01                                | <0.010.88 | -0.04                        | <0.0001 | -0.06                       | 0.165   |
| Hispanic                                                                   | 0.16                                |           | 0.12                         | <0.0001 | 0.19                        | <0.0001 |
| Other                                                                      | -0.01                               |           | -0.01                        | 0.95    | 0.02                        | 0.678   |
| <b>Objective measures</b>                                                  |                                     |           |                              |         |                             |         |
| BMI (kg/m <sup>2</sup> )                                                   | 0.12                                | 0.01      | 0.03                         | <0.01   | 0.19                        | <0.0001 |
| Systolic blood pressure (mm Hg)                                            | -0.13                               | <0.01     | -0.10                        | <0.0001 | -0.15                       | <0.01   |
| Diastolic blood pressure (mm Hg)                                           | 0.16                                | <0.01     | 0.06                         | <0.0001 | 0.10                        | 0.04    |
| Heart rate (beats per minute)                                              | 0.08                                | 0.11      | 0.06                         | <0.0001 | 0.05                        | 0.27    |
| HbA <sub>1c</sub> (%)                                                      | -0.09                               | 0.05      | -0.08                        | <0.0001 | -0.01                       | 0.86    |
| Fasting glucose (mg/dL)                                                    | -0.07                               | 0.13      | -0.05                        | <0.0001 | 0.05                        | 0.30    |
| Total cholesterol (mg/dL)                                                  | -0.10                               | 0.03      | -0.05                        | <0.0001 | -0.03                       | 0.48    |
| LDL (mg/dL)                                                                | -0.11                               | 0.13      | -0.02                        | 0.32    | 0.01                        | 0.87    |
| HDL (mg/dL)                                                                | -0.16                               | <0.0001   | -0.17                        | <0.0001 | -0.21                       | <0.0001 |
| Triglyceride (mg/dL)                                                       | -0.01                               | 0.94      | 0.07                         | <0.0001 | 0.08                        | 0.27    |
| C-reactive protein (mg/dL)                                                 | -0.06                               | 0.25      | -0.06                        | <0.0001 | -0.09                       | 0.07    |
| Ferritin (ng/mL)                                                           | 0.05                                | 0.63      | 0.01                         | 0.41    | 0.12                        | 0.20    |
| Creatinine (mg/dL)                                                         | -0.27                               | <0.0001   | -0.10                        | <0.0001 | -0.25                       | <0.0001 |
| Creatinine phosphokinase (IU/L)                                            | -0.02                               | 0.89      | 0.13                         | <0.0001 | -0.06                       | 0.66    |
| <b>Medication use</b>                                                      |                                     |           |                              |         |                             |         |
| Beta-blocker (%)                                                           | -0.06                               | 0.17      | -0.13                        | <0.0001 | -0.07                       | 0.15    |
| Statin (%)                                                                 | -0.04                               | 0.42      | -0.09                        | <0.0001 | -0.05                       | 0.29    |
| Insulin (%)                                                                | -0.03                               | 0.58      | -0.05                        | <0.0001 | -0.02                       | 0.64    |
| Oral hypoglycemic (%)                                                      | 0.01                                | 0.88      | 0.10                         | <0.0001 | 0.13                        | 0.20    |
| Anti-depressant (%)                                                        | -0.04                               | 0.41      | -0.10                        | <0.0001 | -0.04                       | 0.38    |
| Anti-anxiety (%)                                                           | -0.10                               | 0.04      | -0.04                        | <0.0001 | -0.01                       | 0.76    |
| Anti-psychotic (%)                                                         | -0.04                               | 0.45      | -0.03                        | <0.01   | -0.03                       | 0.48    |
| <b>Metabolic equivalents (METs)/Physical parameters</b>                    |                                     |           |                              |         |                             |         |
| Total MET (work and rec activity)                                          | -0.04                               | 0.50      | 0.12                         | <0.0001 | 0.07                        | 0.298   |
| Work/job requires vigorous activity (%)                                    | -0.07                               | 0.14      | -0.10                        | <0.0001 | 0.04                        | 0.469   |
| Vigorous work MET                                                          | -0.35                               | 0.02      | 0.07                         | 0.01    | -0.02                       | 0.91    |
| Work/job requires moderate activity (%)                                    | 0.03                                | 0.50      | -0.07                        | <0.0001 | -0.04                       | 0.42    |
| Moderate work MET                                                          | 0.04                                | 0.67      | 0.09                         | <0.0001 | 0.18                        | 0.05    |
| Walks/bikes for transportation (%)                                         | -0.08                               | 0.10      | -0.07                        | <0.0001 | -0.09                       | 0.07    |
| Transportation MET                                                         | 0.01                                | 0.99      | 0.01                         | 0.64    | 0.06                        | 0.57    |
| Participates in vigorous recreational activity (%)                         | -0.05                               | 0.27      | -0.09                        | <0.0001 | -0.06                       | 0.21    |
| Vigorous recreational MET                                                  | -0.04                               | 0.79      | 0.16                         | <0.0001 | 0.26                        | 0.12    |
| Participates in moderate recreational activity (%)                         | -0.08                               | 0.10      | 0.01                         | 0.54    | -0.01                       | 0.96    |
| Moderate recreational MET                                                  | 0.04                                | 0.58      | 0.04                         | 0.02    | 0.25                        | <0.01   |
| <b>Cognitive/well-being parameters</b>                                     |                                     |           |                              |         |                             |         |
| Number of days in the past month physical health was not good              | 0.02                                | 0.69      | -0.06                        | <0.0001 | -0.07                       | 0.18    |
| Number of days in the past month mental health was not good                | -0.06                               | 0.23      | 0.01                         | 0.87    | 0.07                        | 0.16    |
| Number of days in the past month inactive due to physical or mental health | -0.01                               | 0.79      | -0.05                        | <0.0001 | 0.01                        | 0.99    |
| Physical, mental or emotional limitation kept from working (%)             | 0.07                                | 0.13      | 0.06                         | <0.0001 | -0.07                       | 0.12    |
| Experience confusion/memory problem (%)                                    | 0.08                                | 0.22      | 0.05                         | <0.0001 | 0.07                        | 0.13    |
| Limited in activity due to physical, mental or emotional problem (%)       | 0.05                                | 0.44      | 0.03                         | 0.04    | -0.01                       | 0.96    |
| <b>Social factors</b>                                                      |                                     |           |                              |         |                             |         |
| Smoked at least 100 cigarettes                                             | 0.05                                | 0.27      | -0.02                        | 0.15    | -0.01                       | 0.82    |
| Currently smoking daily                                                    | 0.06                                | 0.40      | 0.12                         | <0.0001 | 0.06                        | 0.41    |
| Consumed at least 12 drinks per year                                       | -0.07                               | 0.27      | -0.09                        | <0.0001 | -0.01                       | 0.92    |

| <b>Nutrient Intake</b>                                   |       |      |       |         |       |      |
|----------------------------------------------------------|-------|------|-------|---------|-------|------|
| Calories consumed in 24 hour recall (kcal/day)           | 0.13  | 0.01 | 0.15  | <0.0001 | -0.01 | 0.91 |
| Calories consumed, adjusted by body weight (kcal/day/kg) | 0.02  | 0.64 | 0.10  | <0.0001 | -0.10 | 0.03 |
| % calorie intake compared to DRI for energy              | 0.02  | 0.64 | 0.10  | <0.0001 | -0.10 | 0.03 |
| Carbohydrate consumed (g)                                | 0.08  | 0.09 | 0.14  | <0.0001 | -0.02 | 0.61 |
| Carbohydrate consumed (%)                                | -0.04 | 0.35 | 0.01  | 0.31    | 0.04  | 0.40 |
| Protein consumed (g)                                     | 0.12  | 0.01 | 0.11  | <0.0001 | -0.02 | 0.73 |
| Protein consumed (%)                                     | -0.02 | 0.66 | -0.05 | <0.0001 | -0.08 | 0.08 |
| Fat consumed (g)                                         | 0.12  | 0.01 | 0.11  | <0.0001 | 0.01  | 0.97 |
| Fat consumed (%)                                         | 0.06  | 0.21 | -0.01 | 0.30    | -0.01 | 0.76 |
| Selenium intake (mcg)                                    | -0.09 | 0.26 | -0.01 | 0.80    | -0.15 | 0.11 |

Data are Pearson's correlation coefficient (r) and corresponding p-value. T<sub>4</sub>: thyroxine; T<sub>3</sub>: tri-iodothyronine, BMI: body mass index, HbA<sub>1C</sub>: hemoglobin A<sub>1C</sub>, LDL: low-density lipoprotein cholesterol, HDL: high-density lipoprotein cholesterol, DRI: dietary reference intake.

**Supplemental Table 7: Correlations of clinical parameters with free T<sub>4</sub>.**

|                                                                            | LT <sub>4</sub> -treated<br>(n=469) |         | Healthy Controls<br>(n=9512) |         | Matched controls<br>(n=469) |         |
|----------------------------------------------------------------------------|-------------------------------------|---------|------------------------------|---------|-----------------------------|---------|
|                                                                            | Correlation coefficient             | p-value | Correlation coefficient      | p-value | Correlation coefficient     | p-value |
| <b>Demographics</b>                                                        |                                     |         |                              |         |                             |         |
| Age (years)                                                                | 0.28                                | <0.0001 | 0.03                         | 0.001   | 0.118                       | 0.01    |
| Female (%)                                                                 | 0.11                                | 0.02    | -0.05                        | <0.0001 | 0.031                       | 0.51    |
| Race/Ethnicity (%)                                                         |                                     |         |                              |         |                             |         |
| Non-Hispanic White                                                         | 0.04                                | 0.38    | -0.04                        | 0.001   | -0.022                      | 0.63    |
| Non-Hispanic Black                                                         | -0.04                               | 0.38    | -0.03                        | 0.007   | -0.007                      | 0.87    |
| Hispanic                                                                   | -0.02                               | 0.61    | 0.01                         | 0.874   | -0.020                      | 0.57    |
| Other                                                                      | 0.01                                | 0.88    | 0.11                         | <0.0001 | 0.093                       | 0.05    |
| <b>Objective measures</b>                                                  |                                     |         |                              |         |                             |         |
| BMI (kg/m <sup>2</sup> )                                                   | -0.10                               | 0.04    | -0.04                        | <0.0001 | -0.01                       | 0.78    |
| Systolic blood pressure (mm Hg)                                            | 0.08                                | 0.10    | 0.01                         | 0.54    | -0.06                       | 0.19    |
| Diastolic blood pressure (mm Hg)                                           | -0.14                               | <0.01   | -0.05                        | <0.0001 | -0.12                       | 0.01    |
| Heart rate (beats per minute)                                              | -0.06                               | 0.18    | -0.02                        | 0.13    | 0.04                        | 0.46    |
| HbA <sub>1c</sub> (%)                                                      | -0.04                               | 0.40    | 0.07                         | <0.0001 | -0.01                       | 0.92    |
| Fasting glucose (mg/dL)                                                    | 0.01                                | 0.81    | 0.08                         | <0.0001 | 0.02                        | 0.61    |
| Total cholesterol (mg/dL)                                                  | -0.14                               | <0.01   | -0.13                        | <0.0001 | -0.08                       | 0.08    |
| LDL (mg/dL)                                                                | -0.09                               | 0.24    | -0.078                       | <0.0001 | -0.05                       | 0.47    |
| HDL (mg/dL)                                                                | 0.01                                | 0.71    | -0.03                        | <0.01   | 0.01                        | 0.97    |
| Triglyceride (mg/dL)                                                       | -0.27                               | <0.0001 | -0.11                        | <0.0001 | -0.23                       | <0.01   |
| C-reactive protein (mg/dL)                                                 | 0.02                                | 0.67    | 0.07                         | <0.0001 | 0.05                        | 0.29    |
| Ferritin (ng/mL)                                                           | 0.07                                | 0.46    | 0.05                         | <0.01   | -0.08                       | 0.43    |
| Creatinine (mg/dL)                                                         | 0.02                                | 0.69    | 0.07                         | <0.0001 | 0.08                        | 0.08    |
| Creatinine phosphokinase (IU/L)                                            | -0.12                               | 0.34    | -0.04                        | 0.12    | -0.22                       | 0.07    |
| <b>Medication use</b>                                                      |                                     |         |                              |         |                             |         |
| Beta-blocker (%)                                                           | 0.03                                | 0.49    | 0.04                         | <0.0001 | 0.09                        | 0.05    |
| Statin (%)                                                                 | -0.05                               | 0.30    | 0.01                         | 0.50    | -0.12                       | 0.01    |
| Insulin (%)                                                                | -0.05                               | 0.26    | 0.04                         | <0.0001 | 0.01                        | 0.87    |
| Oral hypoglycemic (%)                                                      | -0.22                               | 0.01    | -0.62                        | 0.02    | -0.05                       | 0.60    |
| Anti-depressant (%)                                                        | -0.16                               | <0.0001 | -0.07                        | <0.0001 | -0.05                       | 0.31    |
| Anti-anxiety (%)                                                           | 0.01                                | 0.96    | -0.02                        | 0.02    | 0.05                        | 0.30    |
| Anti-psychotic (%)                                                         | -0.01                               | 0.98    | -0.01                        | <0.01   | 0.02                        | 0.60    |
| <b>Metabolic equivalents (METs)/Physical parameters</b>                    |                                     |         |                              |         |                             |         |
| Total MET (work and rec activity)                                          | -0.08                               | 0.2     | -0.06                        | <0.0001 | -0.04                       | 0.50    |
| Work/job requires vigorous activity (%)                                    | -0.11                               | 0.48    | 0.04                         | <0.0001 | 0.01                        | 0.85    |
| Vigorous work MET                                                          | -0.03                               | 0.50    | -0.05                        | 0.04    | -0.28                       | 0.16    |
| Work/job requires moderate activity (%)                                    | -0.01                               | 0.86    | 0.04                         | <0.0001 | 0.04                        | 0.45    |
| Moderate work MET                                                          | -0.21                               | 0.03    | -0.04                        | 0.01    | -0.01                       | 0.94    |
| Walks/bikes for transportation (%)                                         | -0.01                               | 0.82    | -0.01                        | 0.34    | -0.05                       | 0.32    |
| Transportation MET                                                         | -0.02                               | 0.84    | -0.04                        | 0.09    | -0.03                       | 0.82    |
| Participates in vigorous recreational activity (%)                         | 0.10                                | 0.04    | -0.02                        | 0.10    | 0.01                        | 0.82    |
| Vigorous recreational MET                                                  | 0.12                                | 0.44    | 0.02                         | 0.42    | 0.02                        | 0.92    |
| Participates in moderate recreational activity (%)                         | 0.03                                | 0.53    | 0.02                         | 0.15    | 0.08                        | 0.12    |
| Moderate recreational MET                                                  | 0.09                                | 0.24    | -0.02                        | 0.24    | 0.09                        | 0.29    |
| <b>Cognitive/well-being parameters</b>                                     |                                     |         |                              |         |                             |         |
| Number of days in the past month physical health was not good              | -0.11                               | 0.03    | 0.01                         | 0.90    | -0.02                       | 0.63    |
| Number of days in the past month mental health was not good                | -0.11                               | 0.02    | -0.03                        | 0.02    | 0.04                        | 0.36    |
| Number of days in the past month inactive due to physical or mental health | -0.10                               | 0.03    | 0.01                         | 0.75    | -0.02                       | 0.62    |
| Physical, mental or emotional limitation kept from working (%)             | 0.08                                | 0.08    | -0.03                        | <0.01   | 0.04                        | 0.42    |
| Experience confusion/memory problem (%)                                    | 0.03                                | 0.53    | -0.02                        | 0.10    | -0.08                       | 0.09    |
| Limited in activity due to physical, mental or emotional problem (%)       | -0.08                               | 0.19    | -0.01                        | 0.49    | -0.02                       | 0.69    |
| <b>Social factors</b>                                                      |                                     |         |                              |         |                             |         |
| Smoked at least 100 cigarettes                                             | 0.04                                | 0.44    | 0.01                         | 0.45    | -0.04                       | 0.39    |
| Currently smoking daily                                                    | -0.11                               | 0.10    | -0.04                        | 0.01    | -0.01                       | 0.84    |
| Consumed at least 12 drinks per year                                       | 0.10                                | 0.09    | 0.04                         | <0.01   | -0.04                       | 0.47    |

| <b>Nutrient Intake</b>                                   |       |       |       |         |       |      |
|----------------------------------------------------------|-------|-------|-------|---------|-------|------|
| Calories consumed in 24 hour recall (kcal/day)           | -0.14 | <0.01 | -0.07 | <0.0001 | -0.12 | 0.01 |
| Calories consumed, adjusted by body weight (kcal/day/kg) | -0.05 | 0.34  | -0.04 | <0.0001 | -0.09 | 0.07 |
| % calorie intake compared to DRI for energy              | -0.05 | 0.34  | -0.04 | <0.0001 | -0.09 | 0.07 |
| Carbohydrate consumed (g)                                | -0.10 | 0.05  | -0.06 | <0.0001 | -0.10 | 0.05 |
| Carbohydrate consumed (%)                                | 0.06  | 0.242 | 0.04  | <0.01   | -0.02 | 0.66 |
| Protein consumed (g)                                     | -0.14 | <0.01 | -0.05 | <0.0001 | -0.08 | 0.07 |
| Protein consumed (%)                                     | -0.01 | 0.89  | 0.02  | 0.03    | 0.06  | 0.18 |
| Fat consumed (g)                                         | -0.10 | 0.04  | -0.06 | <0.0001 | -0.09 | 0.05 |
| Fat consumed (%)                                         | 0.01  | 0.95  | -0.01 | 0.53    | 0.03  | 0.51 |
| Selenium intake (mcg)                                    | -0.06 | 0.48  | -0.02 | 0.39    | 0.02  | 0.83 |

Data are Pearson's correlation coefficient (r) and corresponding p-value. T<sub>4</sub>: thyroxine; T<sub>3</sub>: tri-iodothyronine, BMI: body mass index, HbA<sub>1C</sub>: hemoglobin A<sub>1C</sub>, LDL: low-density lipoprotein cholesterol, HDL: high-density lipoprotein cholesterol, DRI: dietary reference intake.

**Supplemental Table 8: Univariate regression analysis of clinical parameters and the serum free T<sub>3</sub>:free T<sub>4</sub> ratio.**

|                                                                            | Healthy Controls<br>(n=9512) |         |
|----------------------------------------------------------------------------|------------------------------|---------|
|                                                                            | Regression<br>Coefficient    | p-value |
| <b>Demographics variables</b>                                              |                              |         |
| Age (5 year increase)                                                      | -0.06                        | <0.0001 |
| Female                                                                     | -0.14                        | <0.0001 |
| Hispanic                                                                   | 0.16                         | <0.0001 |
| Non-Hispanic White                                                         | -0.05                        | <0.01   |
| Non-Hispanic Black                                                         | -0.01                        | 0.85    |
| Other race/ethnicity                                                       | -0.29                        | <0.0001 |
| <b>Objective measures</b>                                                  |                              |         |
| BMI (5 kg/m <sup>2</sup> increase)                                         | 0.04                         | <0.0001 |
| Systolic blood pressure (mm Hg)                                            | -0.01                        | <0.0001 |
| Diastolic blood pressure (mm Hg)                                           | 0.01                         | <0.0001 |
| Heart rate (beats per minute)                                              | 0.01                         | <0.0001 |
| HgbA <sub>1c</sub> (%)                                                     | -0.09                        | <0.0001 |
| Fasting glucose (50 mg/dL increase)                                        | -0.11                        | <0.0001 |
| Total cholesterol (50 mg/dL increase)                                      | 0.07                         | <0.0001 |
| LDL (50 mg/dL increase)                                                    | 0.05                         | <0.01   |
| HDL (50 mg/dL increase)                                                    | -0.23                        | <0.0001 |
| Triglyceride (50 mg/dL increase)                                           | 0.05                         | <0.0001 |
| C-reactive protein (mg/dL)                                                 | -0.08                        | <0.0001 |
| Ferritin (50 ng/dL increase)                                               | -0.02                        | 0.09    |
| Creatinine (0.5 mg/dL increase)                                            | -0.13                        | <0.0001 |
| Creatinine phosphokinase (50 IU/L increase)                                | 0.02                         | <0.0001 |
| <b>Medication use</b>                                                      |                              |         |
| Beta-blocker                                                               | -0.30                        | <0.0001 |
| Statin                                                                     | -0.19                        | <0.0001 |
| Insulin                                                                    | -0.35                        | <0.0001 |
| Oral hypoglycemic                                                          | 0.20                         | <0.0001 |
| Anti-depressant                                                            | -0.03                        | 0.34    |
| Anti-anxiety                                                               | -0.07                        | 0.20    |
| Anti-psychotic                                                             | -0.02                        | 0.87    |
| <b>Metabolic equivalents (METs)/physical parameters</b>                    |                              |         |
| 1000 MET activity (work and rec activity)                                  | 0.01                         | <0.0001 |
| Work/job requires vigorous activity (%)                                    | -0.22                        | <0.0001 |
| 1000 Vigorous work MET                                                     | 0.01                         | <0.01   |
| Work/job requires moderate activity (%)                                    | -0.13                        | <0.0001 |
| 1000 Moderate work MET                                                     | 0.02                         | <0.0001 |
| Walks/bikes for transportation (%)                                         | -0.07                        | <0.01   |
| 1000 Transportation MET                                                    | 0.01                         | 0.15    |
| Participates in vigorous recreational activity (%)                         | -0.09                        | <0.0001 |
| 1000 Vigorous recreational MET                                             | 0.01                         | <0.0001 |
| Participates in moderate recreational activity (%)                         | -0.01                        | 0.68    |
| 1000 Moderate recreational MET                                             | 0.03                         | 0.01    |
| <b>Cognitive/Well-being parameters</b>                                     |                              |         |
| Excellent/good stated health condition                                     | -0.01                        | 0.60    |
| Poor stated health condition                                               | -0.12                        | 0.02    |
| Number of days in the past month physical health was not good              | -0.01                        | <0.01   |
| Number of days in the past month mental health was not good                | 0.01                         | 0.04    |
| Number of days in the past month inactive due to physical or mental health | -0.01                        | <0.01   |
| Physical, mental or emotional limitation kept from working                 | 0.16                         | <0.0001 |
| Experience confusion/memory problem                                        | 0.14                         | <0.0001 |
| Limited in activity due to physical, mental or emotional problem           | 0.12                         | 0.05    |

| Social factors                                           |       |         |
|----------------------------------------------------------|-------|---------|
| Smoked at least 100 cigarettes                           | -0.03 | 0.12    |
| Currently smoking daily                                  | 0.16  | <0.0001 |
| Consumed at least 12 drinks per year                     | -0.13 | <0.0001 |
| Number of alcoholic drinks consumed per day              | 0.01  | 0.82    |
| Nutrient intake                                          |       |         |
| 1000 calories consumed in 24 hour recall                 | 0.13  | <0.0001 |
| Calories consumed, adjusted by body weight (kcal/day/kg) | 0.01  | <0.0001 |
| % calorie intake compared to DRI for energy              | 0.01  | <0.0001 |
| 100 grams carbohydrate consumed                          | 0.09  | <0.0001 |
| Carbohydrate consumed (%)                                | -0.02 | 0.05    |
| 50 grams protein consumed                                | 0.11  | <0.0001 |
| Protein consumed (%)                                     | -0.01 | <0.0001 |
| 50 grams fat consumed                                    | 0.11  | <0.0001 |
| Fat consumed (%)                                         | 0.01  | 0.74    |
| Selenium intake (mcg)                                    | 0.01  | 0.47    |

LT<sub>4</sub>: levothyroxine, BMI: body mass index, HbA<sub>1C</sub>: hemoglobin A<sub>1C</sub>, LDL: low-density lipoprotein

cholesterol, HDL: high-density lipoprotein cholesterol, DRI: dietary reference intake.

**Supplemental Table 9: Multivariate regression analysis identifies clinical parameters associated with the serum free T<sub>3</sub>:free T<sub>4</sub> ratio.**

|                                             | Healthy Controls<br>(n=9709) |         |
|---------------------------------------------|------------------------------|---------|
|                                             | Regression Coefficient       | p-value |
| Age (5 year increase)                       | -0.10                        | 0.005   |
| Female                                      | -0.24                        | 0.05    |
| BMI (5 kg/m <sup>2</sup> increase)          | 0.04                         | 0.02    |
| Total cholesterol (50 mg/dL increase)       | 0.13                         | 0.03    |
| Triglyceride (50 mg/dL increase)            | 0.04                         | 0.02    |
| Creatinine (0.5 mg/dL increase)             | -0.09                        | 0.04    |
| 1000 MET activity (work and recreation)     | --                           | ns      |
| 1000 calories consumed                      | --                           | ns      |
| Beta-blocker prescription                   | --                           | ns      |
| Currently smoking daily                     | --                           | ns      |
| Number of alcoholic drinks consumed per day | --                           | ns      |

Age was scaled to 5 years, BMI scaled to 5 kg/m<sup>2</sup>, total cholesterol scaled to 50 mg/dL, triglyceride scaled to 50 mg/dL, creatinine scaled to 0.5 mg/dL, beta-blocker use, current smoker, number of alcohol drinks consumed per day, total METs scaled to 1000 MET, and calorie intake scaled to 1000 calories.

HDL and LDL were omitted due to multicollinearity with total cholesterol. BMI: body mass index, MET: metabolic equivalent
